# Supplementary material
Source: PubMed Central journal article supplement (PMC10090130)
Supplement: 41421_2023_534_MOESM1_ESM.pdf [file 41421_2023_534_MOESM1_ESM.pdf]

## Supplementary Information

# High-throughput screening of spike variants uncovers the key residues that alter the affinity and antigenicity of SARS-CoV-2

Yufeng Luo<sup>1, †</sup>, Shuo Liu<sup>2, 3, †</sup>, Jiguo Xue<sup>4, †</sup>, Ye Yang<sup>1</sup>, Junxuan Zhao<sup>1</sup>, Ying Sun<sup>5</sup>, Bolun Wang<sup>1</sup>, Shenyi Yin<sup>1</sup>, Juan Li<sup>1</sup>, Yuchao Xia<sup>6, 7</sup>, Feixiang Ge<sup>1</sup>, Jiqiao Dong<sup>6</sup>, Lvze Guo<sup>6</sup>, Buqing Ye<sup>1</sup>, Weijin Huang<sup>3</sup>, Youchun Wang<sup>2, 3, \* &</sup> Jianzhong Jeff Xi<sup>1, \*</sup>

1. Department of Biomedical Engineering, College of Future Technology, Peking University, Beijing, China

2. Graduate School of Chinese Academy of Medical Sciences & Peking Union Medical College, Beijing, China

3. Division of HIV/AIDS and Sex-transmitted Virus Vaccines, Institute for Biological Product Control, National Institutes for Food and Drug Control (NIFDC), Beijing, China

4. Institute of Health Service and Transfusion Medicine, Beijing, China

5. Academy for Advanced Interdisciplinary Studies, Peking University, Beijing, China

6. GeneX Health Co. Ltd, Beijing, China

7. College of Science, Beijing Information Science and Technology University, Beijing, China

† These authors contributed equally: Yufeng Luo, Shuo Liu, Jiguo Xue.

\* Correspondence to: Youchun Wang (wangyc@nifdc.org.cn) or Jianzhong Jeff Xi (jzxi@pku.edu.cn).

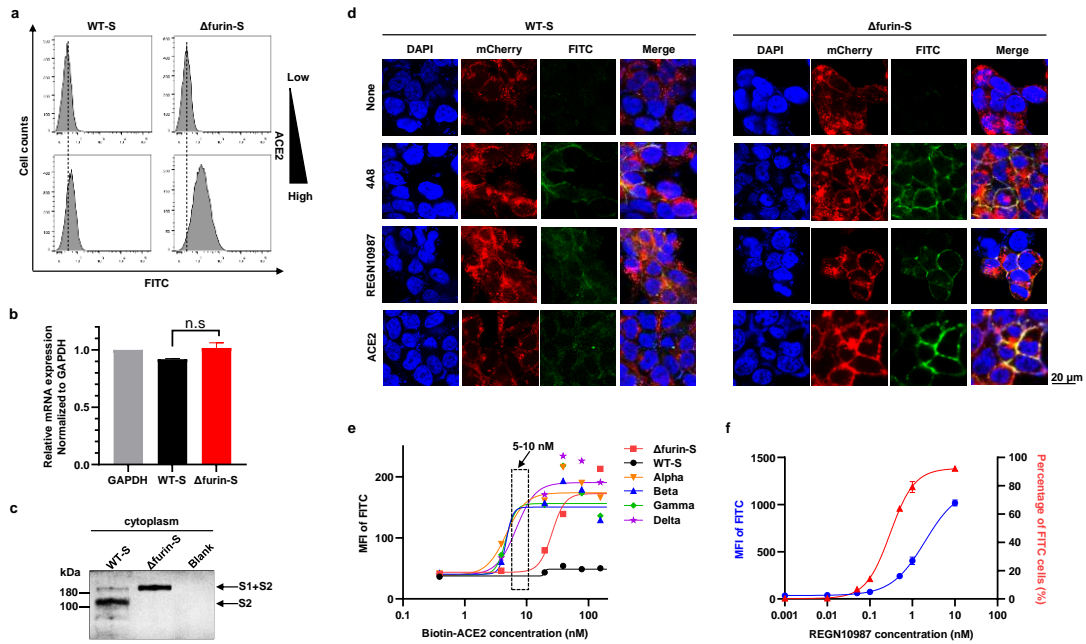

### Supplementary Fig. S1:

#### Evaluation of the mammalian cell-surface-display system for S variants.

**a**, The histogram graph of WT-S and  $\Delta$ furin-S cell line. The x-axis is the FITC signal and the y-axis is the cell counts. The upper panel and the bottom panel represented the incubation with low (0nM) and high (78nM) concentration of biotin-ACE2, respectively. **b**, The relative mRNA expression of S-variant in the WT-S and  $\Delta$ furin-S cell line. GAPDH was served as the control gene. And n.s meant no significant difference. **c**, Western blotting analysis of cytoplasm protein samples that were extracted from the WT-S,  $\Delta$ furin-S, and blank HEK293T cell lines, respectively. The primary antibody targeted the S2 subunit. The Mw of S (S1+S2) and S2 was migrated as ~230 kDa and ~101 kDa due to its glycosylation, respectively. **d**, The confocal imaging of the WT-S and the  $\Delta$ furin-S cell line with the incubation of diverse antibodies (RBD-directed 4A8 and REGN10987) or cellular receptor ACE2. The microscope was photographed at 60 x. The nuclei were stained with DAPI. **e**, MFI of FITC in the WT-S,  $\Delta$ furin-S, and VOC cell lines (Alpha, Beta, Gamma, Delta), incubating with gradient concentration of biotin-ACE2 (0, 0.39, 3.9, 9.75, 19.5, 39, 78, 156 nM). **f**, The percentage of FITC cells and its MFI of FITC for  $\Delta$ furin-S cell line, incubating with varying concentration of REGN10987 (0, 0.001, 0.01, 0.05, 0.1, 0.5, 1, 10 nM).

32  
33  
34  
35  
36  
37  
38  
39  
40  
41  
42  
43  
44  
45  
46  
47  
48  
49  
50  
51  
52  
53  
54  
55

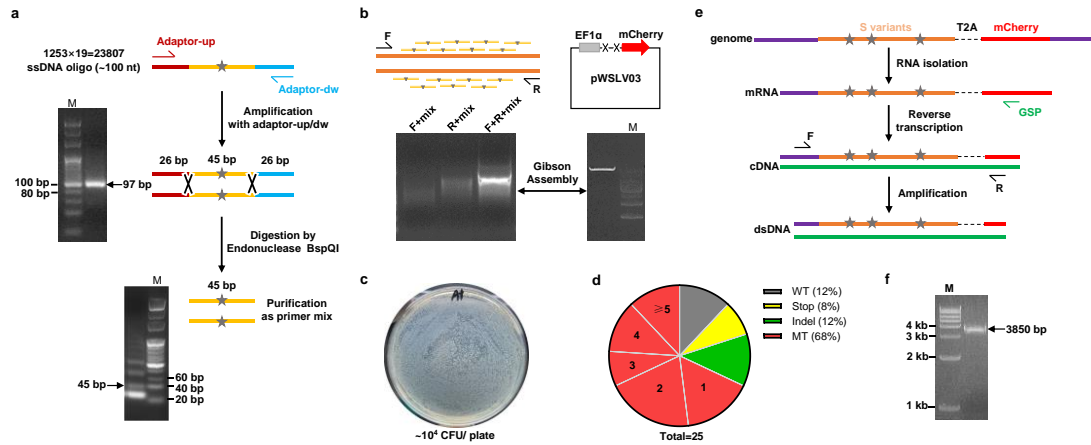

56

57

### Supplementary Fig. S2:

58

### Plasmid library construction and sequencing sample preparation.

59

**a**, The amplification, digestion, and purification of the chip-synthesized pools. 23807 pairs of ~100 nt ssDNA oligos were first amplified to dsDNA. After the digestion with BspQI (X symbol), the mutagenesis primer (45 bp) locating at the middle was cut and purified. Star mark represented the designed mutation.

62

**b**, The ligation of the heterologous S variants fragment and the linearized lentivirus plasmid pWSLV03. The S variants were acquired by two-step overlap PCR (first F+mix 20 cycles, R+mix 20 cycles, respectively; then blended them together for another 10 cycles). The pWSLV03 was cut by NotI and EcoRI (X symbol). **c**, The bacterial transformation plate of the Gibson assembly (~10<sup>4</sup> CFU/plate). **d**,

66

The mutational types were simply analysed by the Sanger sequencing. We randomly picked about 25 colonies and classified the mutational categories as follows: WT meant none mutation or synonymous mutation (n = 3), Stop meant premature stop codon (n = 2); Indel meant insertion or deletion (n = 3); MT meant correct length S variants with the number of mutations ranging from only 1 to ≥ 5 (n = 17).

70

Thereby, the actual positive efficiency was about 70% (17/25). Theoretically, we considered that the useful counts of S variants were equal to the (total colonies) × (positive efficiency). **e**, The preparation of the transcription sample from S<sub>I</sub>, S<sub>II</sub>, and S<sub>III</sub> cells. The first strand cDNA was obtained by GSP primer.

72

The 5' F and 3' R primer was located outside the S variant, respectively. **f**, The amplification of the cDNA for third-generation sequencing (~20 cycles). The resulting PCR product was specific with a band of

74

3850 bp.

76

77

78

79

80

81

82

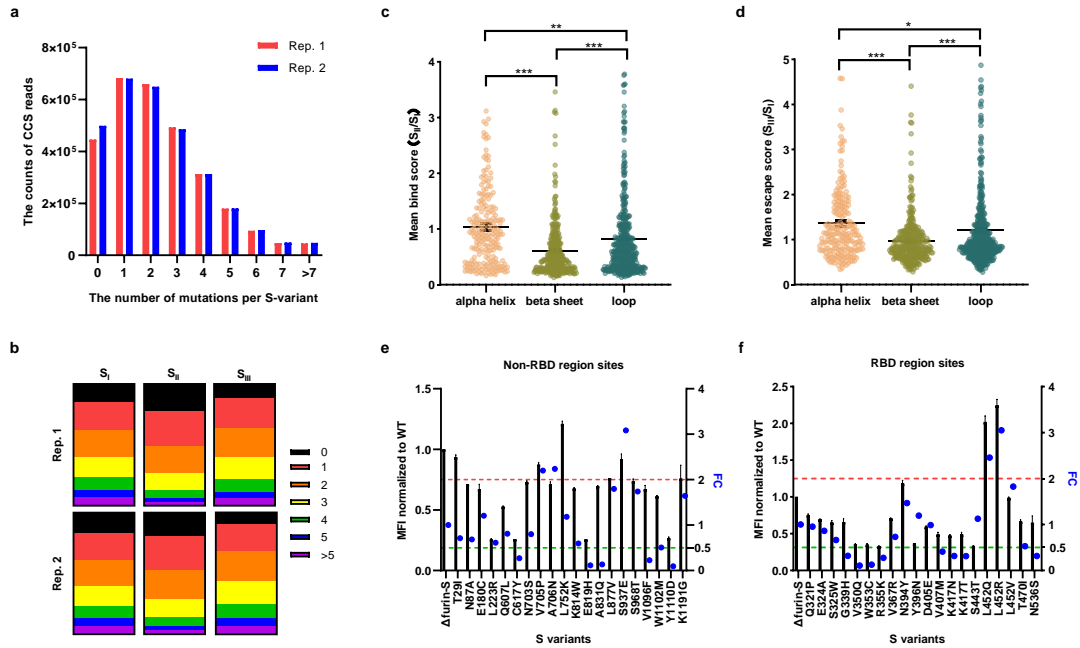

Supplementary Fig. S3:

The mutational feature of S variants during screening and verification.

83  
 84  
 85 **a**, The number of mutation per S variant and its corresponding count of CCS reads in two replicates.  
 86 Rep.1 and Rep.2 were colored in red and blue column, respectively. 0 represented unmutated or those  
 87 with synonymous mutations relative to  $\Delta$ furin-S. **b**, The number of mutations per clone in the cluster of  
 88  $S_I$ ,  $S_{II}$ , and  $S_{III}$ . The proportion of 0, 1, 2, 3, 4, 5, and  $>5$  was colored in black, red, orange, yellow,  
 89 green, blue, and purple, respectively. **c-d**, The comparison of mean bind or escape scores ( $S_{II}/S_I$  or  
 90  $S_{III}/S_I$ ) for residues in alpha helix, beta sheet, and loop (unstructured region). The information of  
 91 secondary structure was obtained through STRIDE (<http://webclu.bio.wzw.tum.de/stride/>) for PDB ID:  
 92 6vyb. **e-f**, 20 mutational types in non-RBD region or RBD-region were tested for setting the suitable  
 93 threshold of the enrichment and de-enrichment, respectively.  
 94

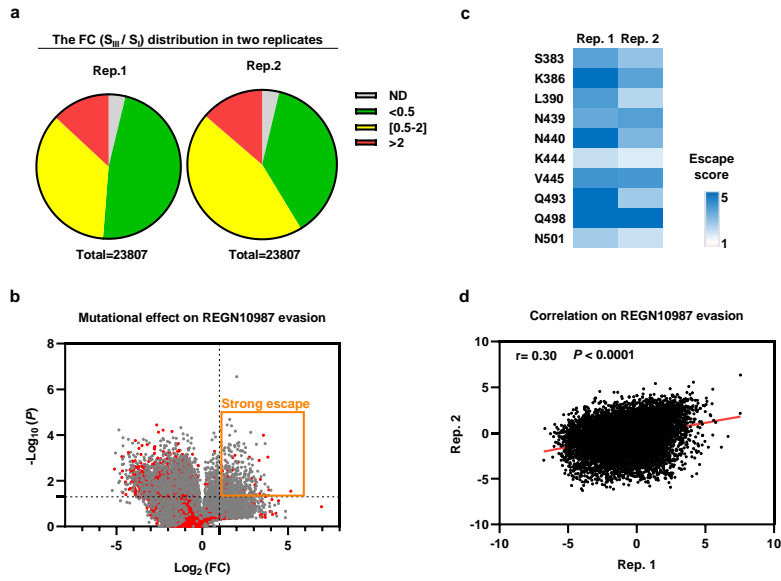

107  
 108  
 109  
 110  
 111  
 112  
 113  
 114  
 115  
 116  
 117  
 118  
 119  
 120  
 121  
 122  
 123  
 124  
 125  
 126  
 127  
 128  
 129  
 130

Supplementary Fig. S4:  
 Analyze the sequencing data for REGN10987 evasion.

**a**, The pie chart of the fold change ( $S_{III} / S_I$ ) distribution in two replicates. Mutational types of ND,  $FC < 0.5$ ,  $0.5 \leq FC \leq 2$ , and  $FC > 2$  were colored in gray, green, yellow, and red, respectively. **b**, The volcano plot of the mutational effect on REGN10987 evasion. The x-axis indicated the  $\log_2(FC)$  and the y-axis indicated the  $-\log_{10}(P)$ . The gray and red dots represented the mutations on non-RBD or RBD region, respectively. The orange rectangle represented the "Strong escape" mutational types that significantly evaded the REGN10987, with  $FC > 2$  and  $P < 0.05$ . **c**, The top ten hotspot residues (S383, K386, L390, N439, N440, K444, V445, Q493, Q498, and N501) on the RBD that were both enriched in two replicates, with the escape score  $> 1.5$ . **d**, The correlation analysis of two replicates for the REGN10987 evasion, with a Pearson coefficient  $r=0.30$ ,  $P < 0.0001$ .

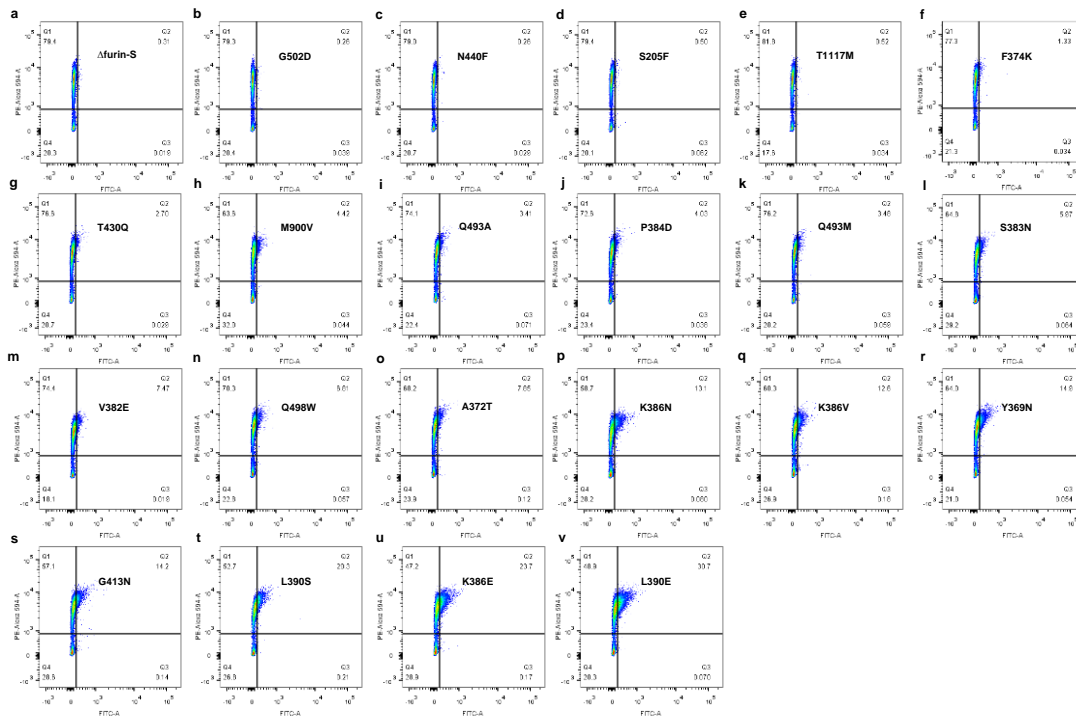

Supplementary Fig. S5:  
MFI of FITC for each S variant cell lines.

a,  $\Delta$ furin-S was the reference strain. b, G502D was set as the negative control. c-v, 20 candidates were tested for the validation of screening data. Each S variant was lentivially-integrated into the HEK293T cells (MOI~0.1) first and then collected for the mCherry<sup>+</sup> cells in order to ensure that the expression was stable. After incubating with biotin-ACE2 (5-10nM) and streptavidin-FITC, the sorting gate was drawn as follows: FSC-A/SSC-A for living cells; FSC-A/FSC-W and SSC-A/SSC-W for single cells; PE- Alexa 594-A/FITC-A for dividing the cluster. The final recorded events were about 20000 per sample. And the MFI of FITC was measured as (The fluorescence intensity in Q1 and Q2/ The cell counts in Q1 and Q2).

131  
132  
133  
134  
135  
136  
137  
138  
139  
140  
141  
142  
143  
144  
145  
146  
147  
148  
149  
150  
151  
152  
153  
154  
155

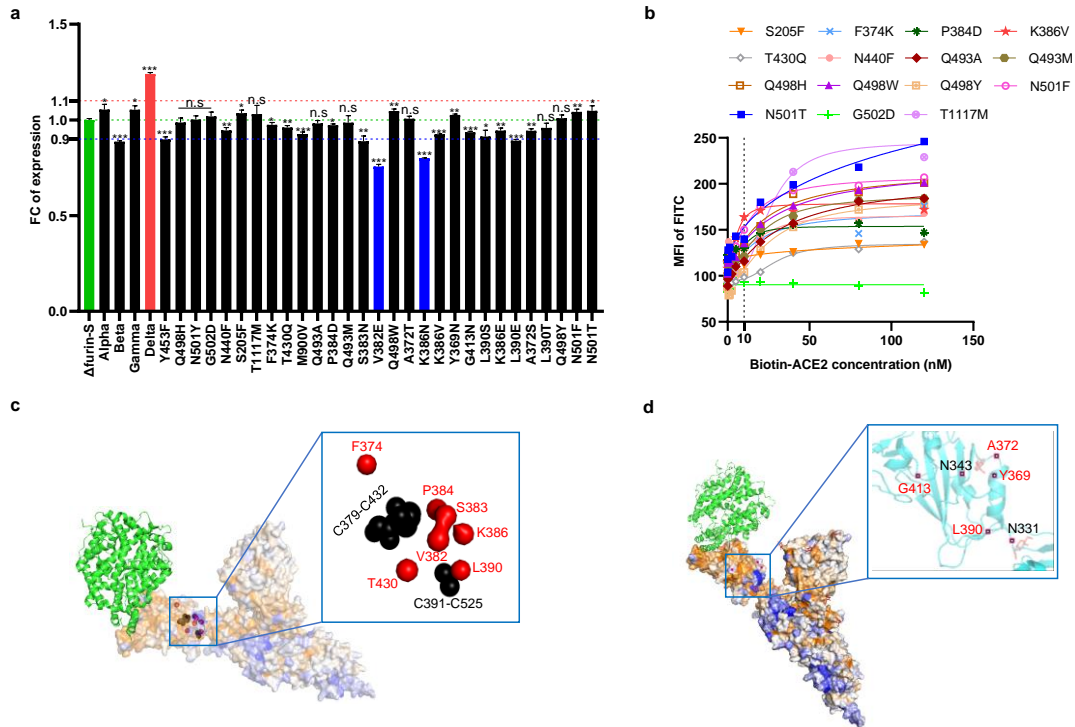

156  
157  
158  
159  
160  
161  
162  
163  
164  
165  
166  
167  
168  
169  
170  
171  
172  
173  
174  
175  
176  
177  
178  
179

Supplementary Fig. S6:

The expression level and structural information of the tested mutants.

**a**, The FC of expression for each S variant, which was normalized to Δfurin-S level (green column). The obvious difference was set as > 1.1 or < 0.9. The t-test analysis was indicated as:  $P > 0.05$  (n.s),  $P < 0.05$  (\*),  $P < 0.01$  (\*\*),  $P < 0.001$  (\*\*\*). **b**, Some candidates were further tested by ACE2 titration curves, which was measured with the gradient concentration (0, 0.125, 0.25, 0.625, 1.25, 2.5, 5, 10, 20, 40, 80, 120 nM). **c**, The position of the important disulfide bonds. The green cartoon structure represented the ACE2 and the surface structure indicated one S protomer (PDB ID: 7DF4). The S was pre-colored with the bind score of each residue (the bluer the tighter affinity). Two disulfide bonds (C391-C525 and C379-C432) were colored in black and the surrounded residues (F374, V382, S383, P384, K386, L390, and T430) were colored in red. **d**, The position of the naturally existed N-glycans (N331 and N343) and the manually introduced N-glycans (Y369, A372, L390, and G413).

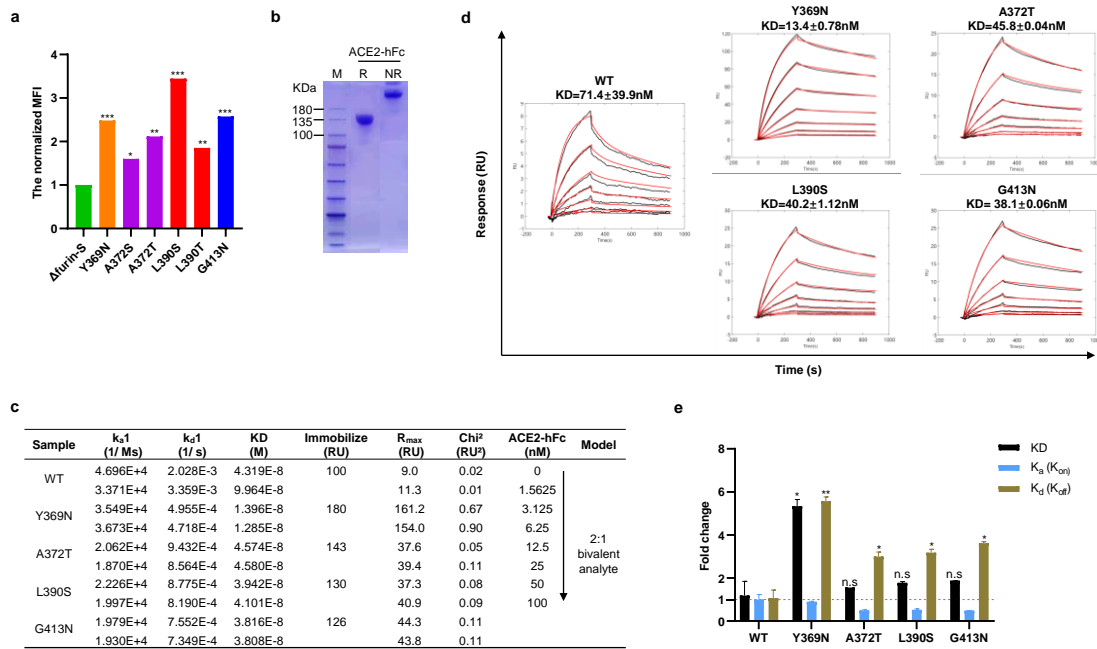

180  
181  
182  
183  
184  
185  
186  
187  
188  
189  
190  
191  
192  
193  
194  
195  
196  
197  
198  
199  
200  
201  
202  
203  
204  
205

Supplementary Fig. S7:  
The affinity of RBD with manually added N-glycan sites.

**a**, The normalized MFI of FITC in N-glycan related S variant cell lines. The t-test analysis was indicated as:  $P > 0.05$  (n.s),  $P < 0.05$  (\*),  $P < 0.01$  (\*\*),  $P < 0.001$  (\*\*\*). **b**, The validation of mobile analyte ACE2-hFc, which was existed in a dimeric form (Mw of NR / R) and with a purity > 95% detecting by SDS-PAGE. **c**, SPR measurement of RBD variants (WT, Y369N, A372T, L390S, and G413N) with ACE2-hFc. Each RBD variant was first immobilized to the CM5 chip (100-200RU) by amine coupling, and then 2-fold serial dilution ACE2-hFc ranging from 0 to 100nM (0, 1.5625, 3.125, 6.25, 12.5, 25, 50, 100nM) was injected to start reaction (5min association, 10min disassociation). **d**, The sensorgram of each RBD variant, the raw data was shown in black curve and the fitted 2:1 (bivalent analyte) binding model was shown in red curve. The x-axis was the reaction time (s) and the y-axis was the response (RU). The final KD (M) was estimated by  $[k_{d1} (1/s) / k_{a1} (1/ Ms)]$  and shown as mean  $\pm$  SD, n=2. **e**, The KD,  $K_a$  ( $K_{on}$ ), and  $K_d$  ( $K_{off}$ ) analysis of the WT and each RBD variant. The fold change was normalized to the WT level, by calculating KD WT/ KD,  $K_{on}$ /  $K_{on}$  WT, and  $K_{off}$  WT/  $K_{off}$ , respectively.



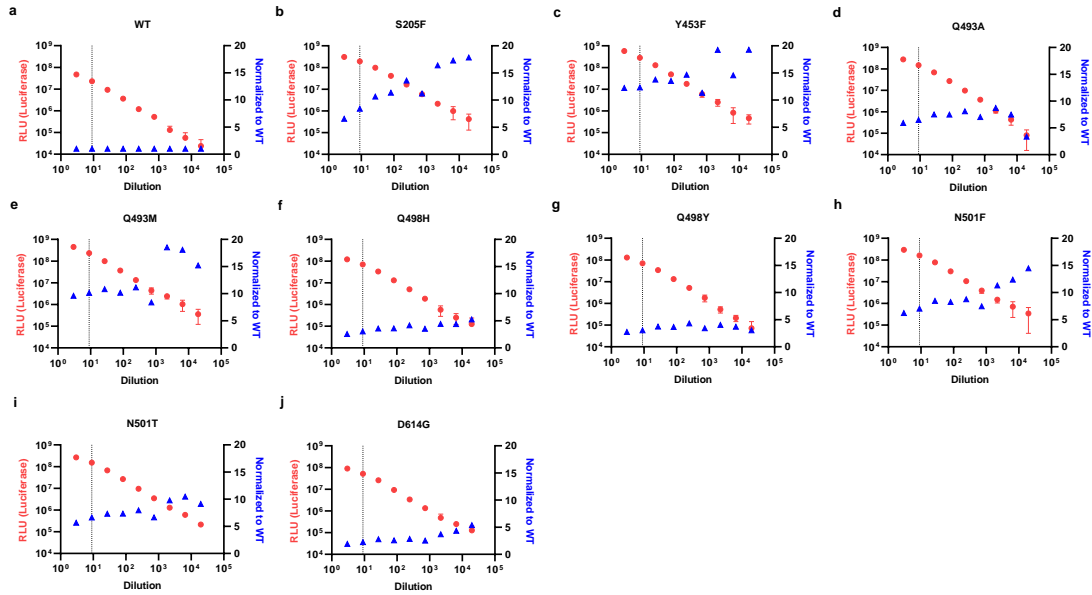

206  
 207  
 208  
 209  
 210  
 211  
 212  
 213  
 214  
 215  
 216  
 217  
 218  
 219  
 220  
 221  
 222  
 223  
 224  
 225  
 226  
 227  
 228  
 229  
 230  
 231  
 232  
 233  
 234

Supplementary Fig. S8:  
 The titration of high-risk S variants pseudoviruses.

**a-j**, The infectivity of serial dilution pseudovirus (3X, 9X, 27X, 81X, 243X, 729X, 2187X, 6561X, and 19683X) for WT, S205F, Y453F, Q493A, Q493M, Q498H, Q498Y, N501F, N501T, and D614G, respectively. The left y-axis represented RLU (luciferase) and the right y-axis meant the normalize to WT. Generally, 9X dilution was considered as the unified infection standard (the vertical dashed line).

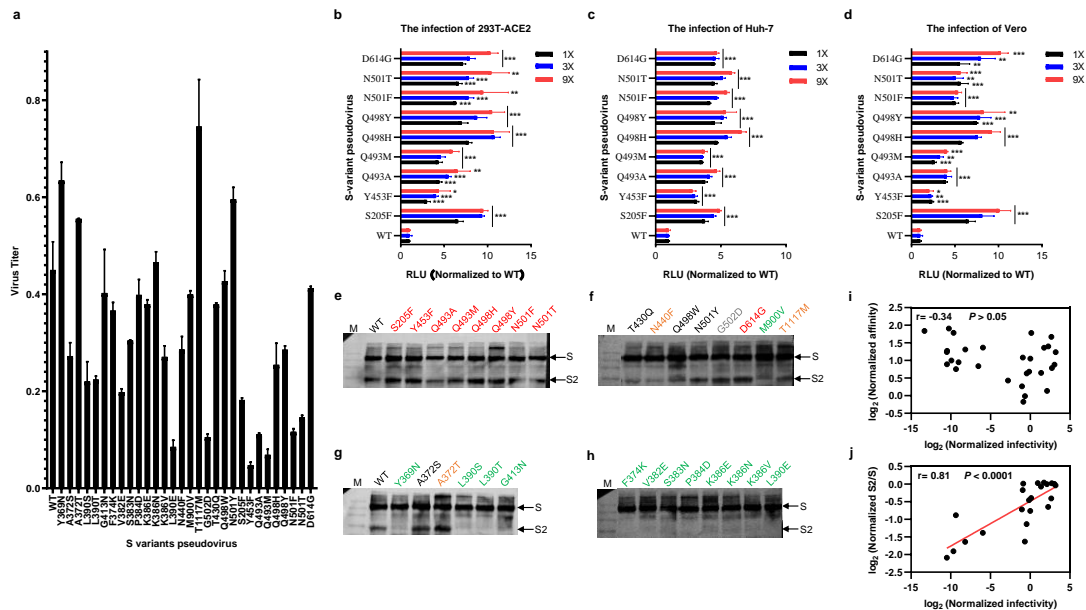

235  
236  
237  
238  
239  
240  
241  
242  
243  
244  
245  
246  
247  
248  
249  
250  
251  
252  
253  
254  
255  
256  
257  
258  
259  
260  
261  
262

### Supplementary Fig. S9:

#### Furin-cleavage activity affect the infectivity of S variants pseudoviruses.

**a**, The virus titer of the tested S variants pseudoviruses. The virus RNA was isolated and immediately quantified by the RT-PCR of VSV-P gene. **b-d**, The normalized infectivity of S variants pseudoviruses to WT (1X, 3X, and 9X dilution), which was measured in the context of 293T-ACE2, Huh-7, and Vero cell lines, respectively. D614G was set as the positive control. **e-h**, The S2/S ratio of all the tested S variants pseudoviruses. The intensity of each protein band was measured by Image J software. **i**, The correlation between infectivity (RLU normalized to WT) and affinity (MFI of FITC normalized to WT). **j**, The correlation between infectivity (RLU normalized to WT) and furin-cleavage activity (S2/S ratio normalized to WT).

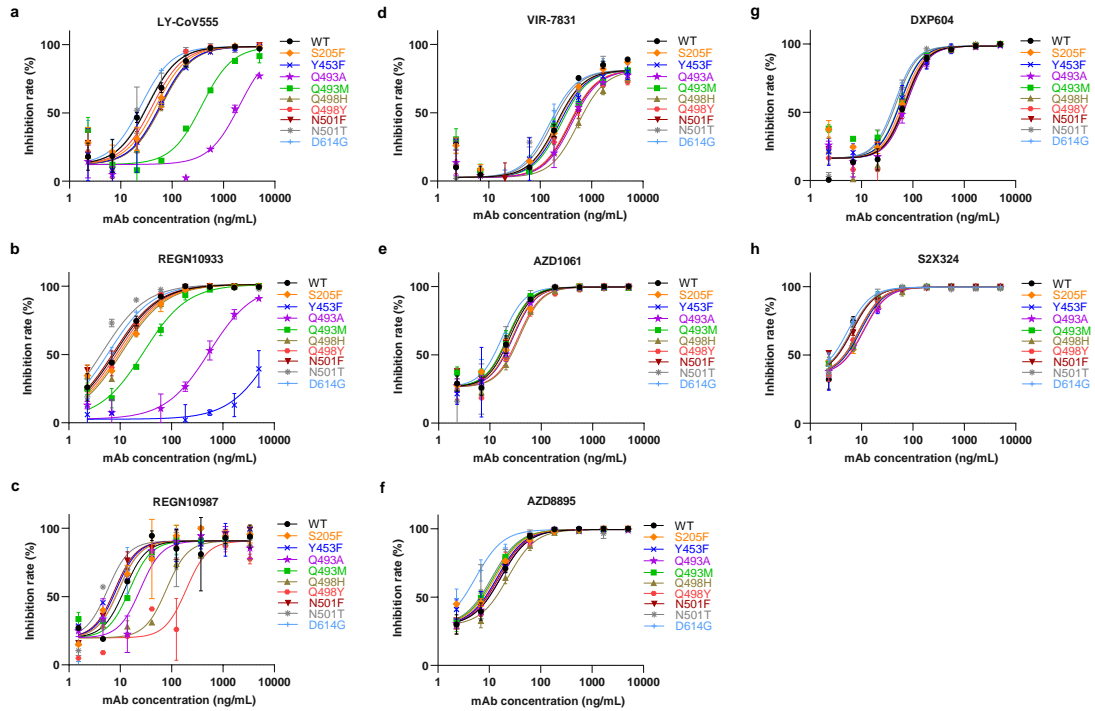

263

264

Supplementary Fig. S10:

265

The neutralization of high-risk S variants pseudoviruses with diverse mAbs.

266

**a**, The inhibition curves of the LY-CoV555, of which Q493A and Q493M showed significant evasion. **b**,

267

The inhibition curves of the REGN10933, of which Y453F and Q493A showed significant evasion. **c**,

268

The inhibition curves of the REGN10987, of which Q498Y and Q498H showed significant evasion. **d**,

269

The inhibition curves of the VIR-7831, of which Q498H and Q498Y showed significant evasion. **e-h**, The

270

inhibition curves of the AZD1061, AZD8895, DXP604, and S2X324, respectively. The tested high-risk S

271

variants displayed no significant evasion.

272

273

274

275

276

277

278

279

280

281

282

283

284

285

286

287

288

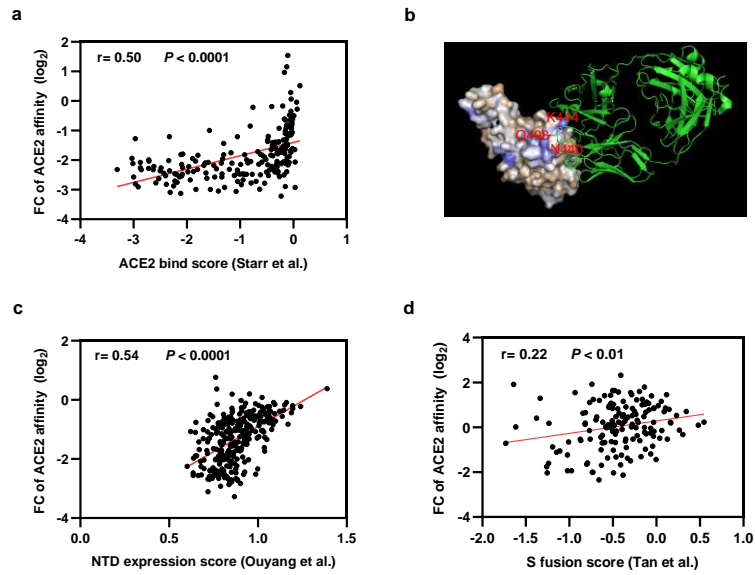

289

290

291

### Supplementary Fig. S11:

#### The correlate analysis with prior published work.

292 **a**, The sequencing data comparison between our work and Starr et al.<sup>28</sup>, in terms of ACE2 affinity. **b**,

293 The epitope recognised by REGN10987. The green cartoon structure was REGN10987 and the surface

294 structure was RBD, which was pre-colored with the escape score of each residue (the bluer the higher

295 evasion). PDB ID: 6XDG. **c**, The sequencing data comparison between our work and Ouyang et al.<sup>65</sup>, in

296 terms of NTD expression. **d**, The sequencing data comparison between our work and Tan et al.<sup>66</sup>, in

297 terms of S fusogenicity.

298

299

300

301

302

303

304

305

306

307

308

309

310

311

312

313

314

315

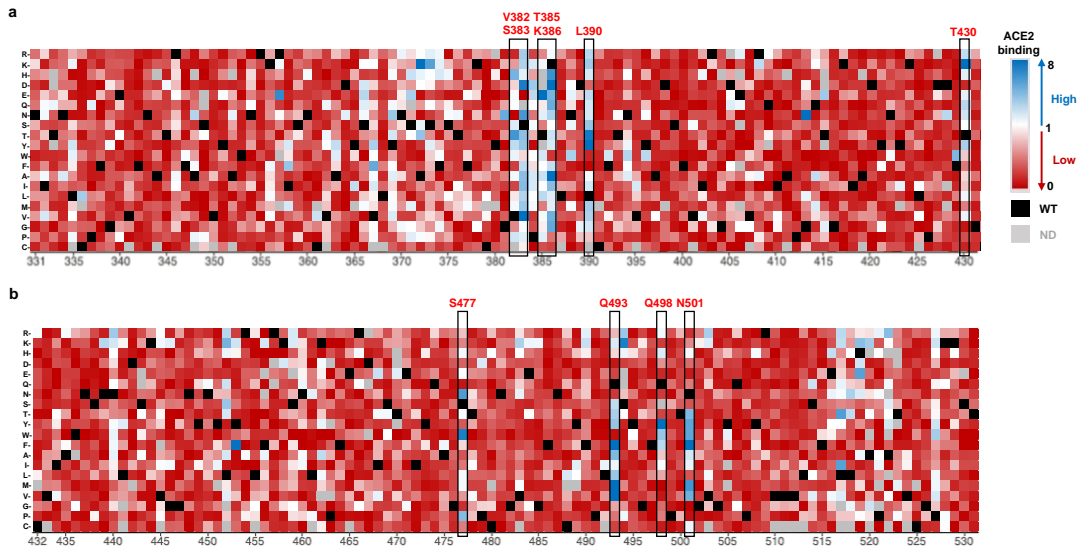

316

317

### Supplementary Fig. S12:

318

#### Identify the key residues in RBD that bind with ACE2.

319

**a**, The heatmap spanning from 331-431aa, where the hotspot residues (V382, S383, T385, K386, L390,

320

and T430) were uniquely enriched in our data. **b**, The heatmap spanning from 432-531aa, where the

321

hotspot residues (S477, Q493, Q498, and N501) were commonly enriched in previous work<sup>28</sup>. The black

322

and gray block represented the original residue (WT) and the nondetected (ND) mutational types,

323

respectively. The red meant lower affinity and the blue meant higher affinity, respectively.

324

325

326

327

328

329

330

331

332

333

334

335

336

337

338

339

340

341

342

343

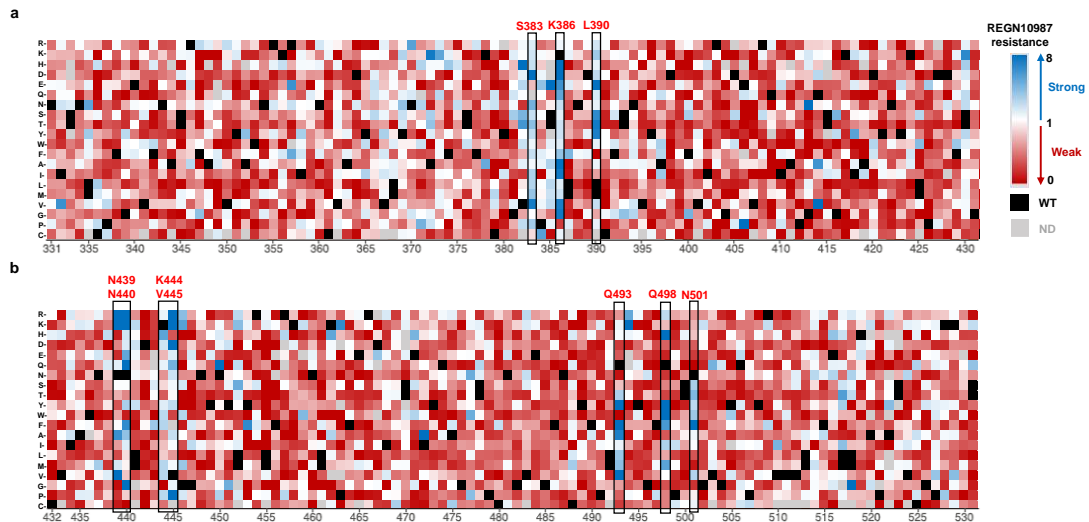

Supplementary Fig. S13:

Identify the key residues in RBD that escape from REGN10987.

**a**, The heatmap spanning from 331-431aa, where the hotspot residues (S383, K386, and L390) were enriched. **b**, The heatmap spanning from 432-531aa, where the hotspot residues (N439, N440, K444, V445, Q493, Q498, and N501) were enriched. The black and gray block represented the original residue (WT) and the ND mutational types, respectively. The red meant weak evasion and the blue meant strong evasion, respectively.

344  
345  
346  
347  
348  
349  
350  
351  
352  
353  
354  
355  
356  
357  
358  
359  
360  
361  
362  
363  
364  
365  
366  
367  
368  
369  
370

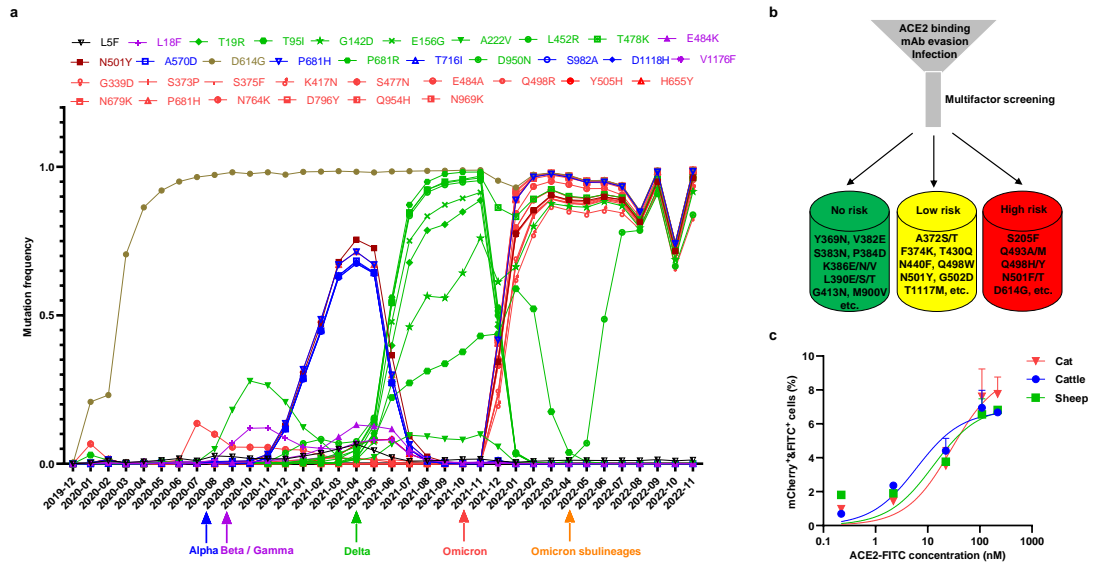

Supplementary Fig. S14:

Keep viral surveillance and continually discover the harmful mutation.

**a**, The mutation frequency of the top-ranked sites in the real world. The time frame spanned from 2019-12 to 2022-11. About 14 million analysed genomic sequences were downloaded from the GISAID database. The mutation sites that appeared in Alpha, Beta, Gamma, Delta, Omicron, and Omicron sublineages were colored in blue, purple, green, red, and orange, respectively. **b**, The sketch map of multifactor screening in this work, taking ACE2 binding, mAb evasion, and pseudovirus infection into account. The green, yellow, and red battery represented no risk (greatly lost the infectivity versus WT), low risk (comparable or slightly lower infectivity relative to WT), and high risk (higher infectivity than WT), respectively. **c**, The dose-dependent curves of S variants library incubating with three animals' ACE2 (cat, cattle, and sheep) that pre-conjugated with FITC. The percentage of double-positive (mcherry<sup>+</sup> & FITC<sup>+</sup>) cells were increased with the adding of ACE2-FITC, so that the S variants with higher adherence could presumably be collected.

## Protein sequence

396

397

398 **>SARS-CoV-2 WT-S-T2A-mCherry (1273aa WT-S is underlined, of which**  
399 **RRAR and KV are red colored, C terminal 19aa is green highlighted; T2A**  
400 **linker is purple highlighted; mCherry is blue highlighted)**

401 MFVFLVLLPLVSSQCVNLTTRTQLPPAYTNSFTRGVYYPDKVFRSSVLHSTQDLFLPFFSNVTWFHAIHV

402 SGTNGTKRFDNPVLPFNDGVYFASTEKSNIRGWIFGTTLDSTQSLIVNNATNVVIKVFCEQFCNDPFL

403 GVYYHKNKSWMESEFRVYSSANNCTFEYVSPFLMDLEGKQGNFKNLREFVFNIDGYFKIYSKHPTI

404 NLVRDLPQGFSALEPLVDLPIGINITRFQTLALHRSYLTGDSGSSGWTAGAAAYYVGYLQPRTFLLKYNE

405 NGTITDAVDCALDPLSETKCTLSFTVEKGIYQTSNFRVQPTESIVRFPNITNLCPFGEVFNATRFASVYA

406 WNRKRISNCVADYSVLYNSASFSTFKCYGVSPTKLNDLCFTNVYADSFVIRGDEVQRQIAPGQTGKIADYN

407 YKLPDDFTGCVIAWNSNNLDSKVGGNYNLYRLFRKSNLKPFERDISTEIQAGSTPCNGVEGFNCYFP

408 LQSYGFQPTNGVGYQPYRVVLSFELLHAPATVCGPKKSTNLVKNKCVNFNFNGLTGTGVLTESNKKFL

409 PFQQFGRDIADTTDAVRDPQLEILDITPCSFGGVSVITPGTNTSNQVAVLYQDVNCTEVPVAIHADQLTP

410 TWRVYSTGSNVFQTRAGCLIGAEHVNSYECDIPIGAGICASYQTQTNSPRRARSVASQSIIAYTMSLGA

411 ENSVAYSNNNSIAIPTNFTISVTTEILPVSMTKTSVDCTMYICGDSTECNLLLQYGSFCTQLNRALTGIAVE

412 QDKNTQEVAQVKQIYKTPPIKDFGGFNFSQILPDPSKPSKRSFIEDLLFNKVTLADAGFIKQYGDCLGDI

413 AARDLICAQKFNGLTVLPLLTDEMAIQYTSALLAGTITSGWTFGAGAALQIPFAMQMAYRFNGIGVTQN

414 VLYENQKLIANQFNSAIGKIQDLSSTASALGKLQDVVNQNAQALNTLVKQLSSNFGAISSVLNDILSRLD

415 KVEAEVQIDRLITGRLQSLQTYVTQQLIRAAEIRASANLAATKMSECVLGQSKRVDFCGKGYHLMSFPQS

416 APHGVVFLHVTVYPAQEKNFTTAPAICHGKAHFPREGVFVSNGTHWFVTQRNFYEPQIITDNTFVSG

417 NCDVVIGIVNNTVYDPLQPELDSFKEELDKYFKNHTSPDVLGDISGINASVVNIQKEIDRLNEVAKNLNE

418 SLIDLQELGKYEQYIKWPWYIWLGFIAGLIAIVMVTIMLCCMTSCCCLKGCCSCGSCCKFDEDDSEPVL

419 KGVKLHYTEFTR EGRGSLLTCGDVEENPGP DMLMAIIKEFMRFKVHMEGSVNGHEFEIEGEGEGRPYE

420 GTQTAKLKVTKGGPLPFAWDILSPQFMYGSKAYVKHPADIPDYKLSFPEGFKWERVMNFEDGGVVTVT

421 QDSSLQDGEFIYKVKLRGTNFPDGPVMQKKTMGWEASSERMYPEDGALKGEIKQRLKLDGGHYDA

422 EVKTTYKAKKPVQLPGAYNVNIKLDITSHNEDYTIVEQYERAEGRHSTGGMDELYK\*

423

424

425



426 >SARS-CoV-2 tPA-RBD-his (the 5' terminal tPA signal peptide is green  
427 highlighted, the middle 223aa-length RBD is underlined, and the 3'  
428 terminal hexa-histidine tag is blue highlighted)

429 MDAMKRGLCCVLLCGAVFVSPSRVQPTESIVRFPNITNLCPFGEVFNATRFASVYAWNKRKISNCVAD  
430 YSVLYNSASFSTFKCYGVSPTKLNDLCFTNVYADSFVIRGDEVQRQIAPGQTGKIADYNYKLPDDFTGCVI  
431 AWNSNNLDSKVGGNYNLYRFLFRKSNLKPFERDISTEIYQAGSTPCNGVEGFNCYFPLQSYGFQPTNG  
432 VGYPYRVVVLSEFLLHAPATVCGPKKSTNLVKNKCVNFHHHHHH\*

433

434

435 >ACE2-hFc (the extracellular domain of ACE2 is underlined, linker is  
436 purple highlighted, hFc is blue highlighted)

437 MSSSSWLLLLSLVAVTAAQSTIEEQAKTFLDKFNHEAEDLFYQSSLASWNYNTNITEENVQNMNAGDKW  
438 SAFLKEQSTLAQMYPLQEIQNLTVKLQLQALQQNGSSVLSSEKSKRLNTILNTMSTIYSTGKVCNPDNPQ  
439 ECLLLEPGLNEIMANSLDYNERLWAWESWRSEVGKQLRPLYEEYVVLKNEMARANHYEDYGDYWRGD  
440 YEVNGVDGYDYSRGLIEDVEHTFEEIKPLYEHLHAYVRAKLMNAYPSYISPIGCLPAHLLGDMWGRFW  
441 TNLYSLTVPFGQKPNIDVTDAMVDQAWDAQRFKEAEKFFVSVGLPNMTQGFWENSMLTDPGNVQKAV  
442 CHPTAWDLGKGDFRILMCTKVTMDDFLTAHHEMGHIQYDMAYAAQPFLLRNGANEGFHEAVGEIMSLSA  
443 ATPKHLKSIGLLSPDFQEDNETEINFLKQALTIVGTLPTMLEKWRWMVFKGEIPKDQWMKKWWEMK  
444 REIVGVVEPVPHDETYCDPASLFHVSNDYSFIRYYTRTLYQFQFQEALCQAAKHEGPLHKCDISNSTEAG  
445 QKLFNMLRLGKSEPWTALENVVGAKNMNVRPLLNYFEPLFTWLKDQNKNSFVGWSTDWSPYADQSI  
446 KVRISLKSALGDKAYEWNDEMILFRSSVAYAMRQYFLKVKNQMILFGEEDVRVANLKPRISFNFFVTAP  
447 KNVSDIIPRTEVEKAIRMSRSRINDAFRLNDNSLEFLGIQPTLGPPNQPPVSPGGDKTHTCPPCAPELL  
448 GGPSVFLFPPKPKDTLMISRTPEVTCVVVDVSHEDPEVKFNWYVDGVEVHNAKTKPREEQYNSTYRVV  
449 SVLTVLHQDWLNGKEYKCKVSNKALPAPIEKTISKAKGQPREPQVYTLPPSRDELTKNQVSLTCLVKGFY  
450 PSDIAVEWESNGQPENNYKTTPPVLDSDGSFFLYSKLTVDKSRWQQGNVVFSCSVMHEALHNHYTQKSL  
451 SLSPGK\*

452

453

454

455

## The bioinformatic analysis of the third-generation DNA sequencing data

### Annotation:

In the following code, L0 is the name of the sample and can be changed by user. The ref.fa file was a 3762bp-length nucleotide sequence (in this case,  $\Delta$ furin-S).

### Steps:

(1) Extract reads from the bam file to generate the corresponding fastq file:

```
samtools view "/L0.subreads.bam"|perl -ne'chomp;@ar=split(/t,$_);{print"@$ar[0]\n$ar[9]\n+\n$ar[10]\n"}' > ./L0.fastq
```

(2) Prepare the ref.fa file and name it Chromosome P according to the reference genome format. In this study, minimap2 software was used to compare and map the fastq file extracted from the previous step (L0.fastq in this case), and the resulting sam file was obtained (L0.sam in this case). The -a parameter specified the output format, and the -x parameter selected the comparison model.

```
minimap2 -ax map-pb ./ref.fa ./L0.fastq > ./L0.sam
```

(3) The main function of script1 is to extract qualified nucleotide sequences from the sam file (L0.sam in this case) and output it in fasta format. The sequencing reads with too short length or too many bases deleting was filtered out. The last parameter of the script1 was del filtering threshold (30bp in this case), which could be changed by user.

```
perl script1.pl ./L0.sam ./ref.fa ./L0.filter.fa 30
```

(4) The main function of script2 is to convert qualified nucleotide sequences into corresponding amino acid sequences, count the number and print them out. The input is the fasta file filtered in the previous step (L0.filter.fa 30 in this case), and the output is L0.result

```
perl script2.pl ./L0.filter.fa ./L0.result
```

(5) The main function of script3 is to conduct analysis on the obtained amino acid sequence (not considering the sequence with premature stop mutation). The final statistical information included the number of mutations in each sequencing read, the number of sequencing reads for each mutational type, and the number of times each original residue position of the sequence was mutated into other amino acids.

```
perl script3.pl ./L0.result ./L0.stat
```

| The codon of 20 natural amino acids (the optimal codon is red highlighted) |                      |                      |                      |                      |                      |                      |                      |                      |                      |                      |                      |                      |                      |                      |                      |                      |                      |                      |                      |
|----------------------------------------------------------------------------|----------------------|----------------------|----------------------|----------------------|----------------------|----------------------|----------------------|----------------------|----------------------|----------------------|----------------------|----------------------|----------------------|----------------------|----------------------|----------------------|----------------------|----------------------|----------------------|
| A                                                                          | R                    | N                    | D                    | C                    | E                    | Q                    | G                    | H                    | I                    | L                    | K                    | M                    | F                    | P                    | S                    | T                    | W                    | Y                    | V                    |
| <b>GCC</b><br>(0.40)                                                       | <b>AGA</b><br>(0.21) | <b>AAC</b><br>(0.53) | <b>GAC</b><br>(0.54) | <b>TGC</b><br>(0.54) | <b>GAG</b><br>(0.58) | <b>CAG</b><br>(0.73) | <b>GGC</b><br>(0.34) | <b>CAC</b><br>(0.58) | <b>ATC</b><br>(0.47) | <b>CTG</b><br>(0.40) | <b>AAG</b><br>(0.57) | <b>ATG</b><br>(1.00) | <b>TTC</b><br>(0.54) | <b>CCC</b><br>(0.32) | <b>AGC</b><br>(0.24) | <b>ACC</b><br>(0.36) | <b>TGG</b><br>(1.00) | <b>TAC</b><br>(0.56) | <b>GTG</b><br>(0.46) |
| <b>GCT</b><br>(0.27)                                                       | <b>AGG</b><br>(0.21) | <b>AAT</b><br>(0.47) | <b>GAT</b><br>(0.46) | <b>TGT</b><br>(0.46) | <b>GAA</b><br>(0.42) | <b>CAA</b><br>(0.27) | <b>GGA</b><br>(0.25) | <b>CAT</b><br>(0.42) | <b>ATT</b><br>(0.36) | <b>CTC</b><br>(0.20) | <b>AAA</b><br>(0.43) |                      | <b>TTT</b><br>(0.46) | <b>CCT</b><br>(0.29) | <b>TCC</b><br>(0.22) | <b>ACA</b><br>(0.28) |                      | <b>TAT</b><br>(0.44) | <b>GTC</b><br>(0.24) |
| <b>GCA</b><br>(0.23)                                                       | <b>CGG</b><br>(0.20) |                      |                      |                      |                      |                      | <b>GGG</b><br>(0.25) |                      | <b>ATA</b><br>(0.17) | <b>TTG</b><br>(0.13) |                      |                      |                      | <b>CCA</b><br>(0.28) | <b>TCT</b><br>(0.19) | <b>ACT</b><br>(0.25) |                      |                      | <b>GTT</b><br>(0.18) |
| <b>GCG</b><br>(0.11)                                                       | <b>CGC</b><br>(0.18) |                      |                      |                      |                      |                      | <b>GGT</b><br>(0.16) |                      |                      | <b>CTT</b><br>(0.13) |                      |                      |                      | <b>CCG</b><br>(0.11) | <b>TCA</b><br>(0.15) | <b>ACG</b><br>(0.11) |                      |                      | <b>GTA</b><br>(0.12) |
|                                                                            | <b>CGA</b><br>(0.11) |                      |                      |                      |                      |                      |                      |                      |                      | <b>TTA</b><br>(0.08) |                      |                      |                      |                      | <b>AGT</b><br>(0.15) |                      |                      |                      |                      |
|                                                                            | <b>CGT</b><br>(0.08) |                      |                      |                      |                      |                      |                      |                      |                      | <b>CTA</b><br>(0.07) |                      |                      |                      |                      | <b>TCG</b><br>(0.05) |                      |                      |                      |                      |

498

499 A: Alanine

500 R: Arginine

501 N: Asparagine

502 D: Aspartic acid

503 C: Cystine

504 E: Glutamic acid

505 Q: Glutamine

506 G: Glycine

507 H: Histidine

508 I: Isoleucine

509 L: Leucine

510 K: Lysine

511 M: Methionine

512 F: Phenylalanine

513 P: Proline

514 S: Serine

515 T: Threonine

516 W: Tryptophan

517 Y: Tyrosine

518 V: Valine

519

520

521

522

523

524

525

526

527

528

529

530

531

532

Supplementary Table S2. Primers used in this study

| Primer name  | Sequence (5'-3') (underlined letter indicated the restriction endonuclease recognition sites, highlighted letter represented the homologous arms for Gibson Assembly) | Application                                                                                                                                                         |
|--------------|-----------------------------------------------------------------------------------------------------------------------------------------------------------------------|---------------------------------------------------------------------------------------------------------------------------------------------------------------------|
| M13F         | TGTA AACGACGGCCAGT                                                                                                                                                    | Amplify ~100nt<br>chip-synthesis oligo pools                                                                                                                        |
| M13R         | CAGGAAACAGCTATGACC                                                                                                                                                    |                                                                                                                                                                     |
| pLV-S-F      | <u>ATATTAAGGGTTCCAAGCTTAA</u> GGGGCCGCGCCACCATGTTTCGTGTTTCTGGTGCTGCTG                                                                                                 | Amplify 1254aa-length<br>S variants to pWSLV03                                                                                                                      |
| pLV-S-R      | <u>AGACTTCCTCTGCCCTCACGCGT</u> GAATTCACAGCAGCTTCCACAAGAACAGCAGC                                                                                                       |                                                                                                                                                                     |
| pLV-GSAS-F   | CAGACAACTCCCCAggcagcgcctccTCTGTGGCAAGCCAGTCCATCATCG                                                                                                                   | Mutate RRAR to GSAS<br>(lower case letter)                                                                                                                          |
| pLV-GSAS-R   | CTGGCTTGCCACAGAggagggcgtgccTGGGGAGTTTGTCTGGGTCTGGTAG                                                                                                                  |                                                                                                                                                                     |
| pLV-PP-F     | CTGAGCCGGCTGGACcctcccGAGGCAGAGGTGCAGATCGACCGGC                                                                                                                        | Mutate KV to PP<br>(lower case letter)                                                                                                                              |
| pLV-PP-R     | CTGCACCTCTGCCTCgggaggGTCCAGCCGGCTCAGGATATCATTC                                                                                                                        |                                                                                                                                                                     |
| pCD-S-F      | <u>ACTTAAGCTTGGTACCGAGCTC</u> GGATCCGCCACCATGTTTCGTGTTTCTGGTGCTGCTGCTG                                                                                                | Amplify 1273aa-length<br>S variants to pCDNA3.1(+)                                                                                                                  |
| pCD-S-R      | <u>GGGTTTAAACGGGCCCTCTAGA</u> CTCGAGTTAGGTGTAGTGCAGCTTCACGCCCTTC                                                                                                      |                                                                                                                                                                     |
| pCD-RBD-1F   | tgctgtgtgctgctgtgtgtggagcagctcttctgctccaccagcAGGGTGCAGCCTACCGAGTCCATCG                                                                                                | Amplify 223aa-length<br>RBD variants to pCDNA3.1(+) with<br>5' tPA signal peptide<br>(lower case letter) and<br>3' hexa-histidine tag<br>(lower case italic letter) |
| pCD-RBD-2F   | <u>ACTTAAGCTTGGTACCGAGCTC</u> GGATCCGCCACCATGgatgcaatgaagagagggctgctgtgtgctgctgctgtgtggag                                                                             |                                                                                                                                                                     |
| pCD-RBD-R    | <u>GGGTTTAAACGGGCCCTCTAGA</u> CTCGAGTTAatggtgatggatgggGAAGTTCACGCAC TTGTTCTTCACC                                                                                      |                                                                                                                                                                     |
| S-seq-1F     | CTGCCATCGGCATCAACATCAC                                                                                                                                                | Verify the correct mutation of each<br>S variants                                                                                                                   |
| S-seq-2F     | TTCCAGCCAACCAACGGCGTGG                                                                                                                                                |                                                                                                                                                                     |
| S-seq-3F     | GAATAGAGCCCTGACAGGCATCG                                                                                                                                               |                                                                                                                                                                     |
| S-seq-4F     | CTGGGCCAGTCCAAGAGAGTGG                                                                                                                                                |                                                                                                                                                                     |
| S-seq-1R     | GCTGCAGATAGCCCACATAGTAG                                                                                                                                               |                                                                                                                                                                     |
| RBD-seq-F    | CTCTGGCTAACTAGAGAACCCACTG                                                                                                                                             | Verify the correct mutation of each<br>RBD variants                                                                                                                 |
| RBD-seq-R    | ACCTTCCAGGGTCAAGGAAGGCACG                                                                                                                                             |                                                                                                                                                                     |
| RT-GSP       | TCGAACTCGTGGCCGTTCAC                                                                                                                                                  | Reverse transcription of total RNA<br>sample                                                                                                                        |
| cDNA-F       | GTTATATTAAGGGTTCCAAGCTTAAGC                                                                                                                                           | Amplify the first strand of cDNA                                                                                                                                    |
| cDNA-R       | CCACGTCACCGCATGTTAGTAGAC                                                                                                                                              |                                                                                                                                                                     |
| qPCR-GAPDH-F | TGCACCACCAACTGCTTAGC                                                                                                                                                  | Quantify the expression of GAPDH                                                                                                                                    |
| qPCR-GAPDH-R | GGCATGGACTGTGGTCATGAG                                                                                                                                                 |                                                                                                                                                                     |
| qPCR-S-F     | ATCTTTGGCACCACACTGGAC                                                                                                                                                 | Quantify the expression of S<br>variants                                                                                                                            |
| qPCR-S-R     | AACTCGCTCTCCATCCAAGACT                                                                                                                                                |                                                                                                                                                                     |
| qPCR-VSV-F   | TCTCGTCTGGATCAGGCGG                                                                                                                                                   | Quantify the titer of S variants<br>pseudovirus                                                                                                                     |
| qPCR-VSV-R   | TGCTCTTCCACTCCATCCTCTTGG                                                                                                                                              |                                                                                                                                                                     |

Supplementary Table S3. The third-generation sequencing reads

| Experiment | The collected mCherry <sup>+</sup> cells for screening (MOI ~0.1) | Totally obtained CCS reads (Accuracy >99%) |                 |                  | Finally analysed CCS reads (Unique reads are underlined) |                             |                             | Average mutation per read |                 |                  |
|------------|-------------------------------------------------------------------|--------------------------------------------|-----------------|------------------|----------------------------------------------------------|-----------------------------|-----------------------------|---------------------------|-----------------|------------------|
|            |                                                                   | S <sub>I</sub>                             | S <sub>II</sub> | S <sub>III</sub> | S <sub>I</sub>                                           | S <sub>II</sub>             | S <sub>III</sub>            | S <sub>I</sub>            | S <sub>II</sub> | S <sub>III</sub> |
| Rep. 1     | 7.5 X 10 <sup>6</sup>                                             | 3.87 M                                     | 3.76 M          | 0.61 M           | 2.96 M<br>( <u>1.64 M</u> )                              | 3.06 M<br>( <u>0.98 M</u> ) | 0.49 M<br>( <u>0.20 M</u> ) | 2.35 aa                   | 1.77 aa         | 2.34 aa          |
| Rep. 2     | 1.0 X 10 <sup>7</sup>                                             | 3.62 M                                     | 3.82 M          | 0.81 M           | 3.00 M<br>( <u>1.66 M</u> )                              | 3.29 M<br>( <u>1.08 M</u> ) | 0.67 M<br>( <u>0.29 M</u> ) | 2.32 aa                   | 1.88 aa         | 2.53 aa          |

535

536

537

538

539

540

541

542

543

544

545

546

547

548

549

550

551

552

553

554

555

556

557

Supplementary Table S4. The relevant work on the screening of RBD, S variants, or its derived mAbs

| Species                                      | Technical route                                                      | Application                                                     | Mutational range                                                          | Throughput                             | Analysis strategy                                                                                                         | Vital mutational types                                                                                        | Ref. |
|----------------------------------------------|----------------------------------------------------------------------|-----------------------------------------------------------------|---------------------------------------------------------------------------|----------------------------------------|---------------------------------------------------------------------------------------------------------------------------|---------------------------------------------------------------------------------------------------------------|------|
| Yeast<br>( <i>Saccharomyces cerevisiae</i> ) | Incubate with dimer<br>ACE2; FACS screen;<br>Titration curves verify | Reveal the feature of<br>RBD folding and<br>ACE2 binding        | RBD (331-531aa)<br>Mutate 201aa                                           | ~ 10 <sup>5</sup> barcoded<br>variants | Link each RBD variant to its barcode via<br>long-read PacBio SMRT sequencing; then<br>deep sequencing of variant barcodes | Low affinity (L455Y, Y449F,<br>N501D, G502D, etc.)<br>High affinity (N501F, N501T,<br>Q498Y, Q498H etc.)      | [28] |
| Yeast<br>( <i>Saccharomyces cerevisiae</i> ) | Incubate with ACE2;<br>FACS screen;<br>Titration curves verify       | S-variants prediction;<br>Antiviral drug design                 | RBD (336-528aa)<br>RBD (431-528aa)<br>RBD (336-528aa)<br>3 cycle mutating | ~ 10 <sup>4</sup> variants             | Sanger sequencing                                                                                                         | RBD62 drug (I358F, V445K,<br>N460K, I468T, T470M, S477N,<br>E484K, Q498R, N501Y)<br>1000-fold higher affinity | [29] |
| Yeast<br>( <i>Saccharomyces cerevisiae</i> ) | Incubate with 10<br>mAbs; FACS screen                                | Map antibody-escape<br>mutation                                 | RBD (331-531aa)<br>Mutate 201aa                                           | ~ 10 <sup>5</sup> barcoded<br>variants | Link each RBD variant to its barcode via<br>long-read PacBio SMRT sequencing; then<br>deep sequencing of variant barcodes | C361, K378, V382, S383, P384,<br>F392, D420, A475, E484, F486,<br>N487, F490, G496, Q498, T500,<br>etc.       | [30] |
| Yeast<br>( <i>Saccharomyces cerevisiae</i> ) | Incubate with 5 mAbs;<br>FACS screen                                 | Identify antibody-<br>escape mutants                            | RBD (333-537aa)<br>Mutate 119aa that were<br>surface-exposed              | ~2000 mutations                        | Isolate genomic DNA, amplify the certain<br>region, send for the next-generation<br>sequencing                            | Escape positions K417, D420,<br>Y421, F486, and Q493 as<br>notable hotspots                                   | [31] |
| Yeast<br>( <i>Saccharomyces cerevisiae</i> ) | Incubate with 7 mAbs;<br>FACS screen                                 | Map antibody-escape<br>mutation by different<br>classes of mAbs | RBD (331-531aa)<br>Mutate 201aa                                           | ~ 10 <sup>5</sup> barcoded<br>variants | Link each RBD variant to its barcode via<br>long-read PacBio SMRT sequencing; then<br>deep sequencing of variant barcodes | R346, K417, K444, Y449, L452,<br>L455, F456, N460, A475, E484,<br>N486, F490, etc.                            | [32] |

|                                                        |                                                                                                                            |                                                          |                                                                                  |                                                                                                             |                                                                                                                                                                                                                                          |                                                                       |      |
|--------------------------------------------------------|----------------------------------------------------------------------------------------------------------------------------|----------------------------------------------------------|----------------------------------------------------------------------------------|-------------------------------------------------------------------------------------------------------------|------------------------------------------------------------------------------------------------------------------------------------------------------------------------------------------------------------------------------------------|-----------------------------------------------------------------------|------|
| Mice<br>(Genetically humanized VelocImmune (VI) breed) | Immunized with a DNA plasmid that expressed S and boosted with a recombinant protein that was composed of RBD; FACS screen | Yield a SARS-CoV-2 antibody cocktail                     | Spleens from mice were subjected to biotin-labeled monomeric RBD antigen         | Naturally paired heavy and light chain cDNAs were cloned, then transfect CHO cells to produce >200 antibody | The antibody variable regions were sequenced by next-generation sequencing, and the repertoire for heavy and light chain pairs was identified;<br><br>The selected four antibodies displayed ~37.1 to 42.8pM affinity against trimeric S | VH3-53 paired with VKI-9, VKI-33, or VKI-39                           | [57] |
| Human<br>(B cells)                                     | Survivor that has been infected by SARS-CoV-2; FACS screen                                                                 |                                                          | Whole blood was collected from patients; Sort RBD-specific B cells               |                                                                                                             |                                                                                                                                                                                                                                          | VH3-66 paired with VKI-33<br>VH3-70 paired with VKI-39                |      |
| Yeast<br>(Saccharomyces cerevisiae)                    | Incubate with monomer ACE2; FACS screen                                                                                    | Understand how epistasis shifts the effects of mutations | RBD (331-531aa) WT/Alpha/Beta/Delta/Eta backbone                                 | ~10 <sup>5</sup> barcoded variants                                                                          | Link each RBD variant to its barcode via long-read PacBio SMRT sequencing; then deep sequencing of variant barcodes                                                                                                                      | Q498R, N501Y, G446, Y449                                              | [62] |
| Mammalian<br>(HEK293T)                                 | Spike display; Flow cytometry                                                                                              | Evaluate the evasion of various mAbs                     | Ectodomain (1-1208aa), but only consider the clinically circulating NTD variants | ~200 variants                                                                                               | Test one S variant at a time                                                                                                                                                                                                             | Y145, K147, and W152 are public epitopes of 4-A8, CM17, CM25, and 1-6 | [64] |
| Mammalian<br>(HEK293T)                                 | Fluorescence-based sorting                                                                                                 | S-based immunogen design (with increased expression)     | Based on S-2P Mutate 14-301aa Cover NTD domain                                   | Thousands of single mutations in parallel                                                                   | Isolate genomic DNA, amplify the certain region, send for the next-generation sequencing                                                                                                                                                 | S50Q and G232E                                                        | [65] |

|                          |                                                                                         |                                                                                     |                                                                                   |                                                  |                                                                                                                                                                                                              |                                                                                                                                                                 |           |
|--------------------------|-----------------------------------------------------------------------------------------|-------------------------------------------------------------------------------------|-----------------------------------------------------------------------------------|--------------------------------------------------|--------------------------------------------------------------------------------------------------------------------------------------------------------------------------------------------------------------|-----------------------------------------------------------------------------------------------------------------------------------------------------------------|-----------|
| Mammalian (HEK293T)      | Fluorescence-based fusion assay;<br>To detect the green-fluorescent syncytia            | Vaccine design (prefusion-stabilized)<br>High expression but<br>Low fusogenicity    | Based on S-2P;<br>Mutate 883-1034aa;<br>Cover HR1 (912-984aa) and CH (985-1034aa) | Thousands of single mutations in parallel        | Isolate genomic DNA, amplify the certain region, send for the next-generation sequencing                                                                                                                     | A892P, A942P, and D994E/Q                                                                                                                                       | [66]      |
| Mammalian (HEK293T-rtTA) | Non-replicative VSV-G pseudotyped lentivirus                                            | Identify mutation that impact the antibody neutralization and pseudovirus infection | Full-length S scale, but only consider the mutations that occurred in GISAID      | ~135000 unique mutation combinations             | First perform long-read PacBio sequencing to link the barcodes to the full set of spike mutations for each variant; then conduct short-read Illumina sequencing of the barcode in all subsequent experiments | N439, K444, G446, G447, P499 for mAb LYCoV1404;<br>S172, L176, D178 for mAb 5-7;<br>D1146, D1153, F1156 for mAb CC9.104, and CC67.105                           | [67]      |
| Mammalian (HEK293T)      | Fluorescence-based sorting (mCherry & FITC); Incubate with dimer ACE2 and mAb REGN10987 | Discover the key residues of tighter ACE2 affinity and higher mAb evasion           | Based on $\Delta$ furin-S;<br>Full-length S scale;<br>Mutate 1-1254aa             | $10^6$ ~ $10^7$ combinations of mutations/ cycle | Isolate the total RNA, reverse-transcribed with GSP, amplification with low cycles, and send for the third-generation DNA sequencing                                                                         | S205F, Y453F, Q493A, Q493M, Q498H, Q498Y, N501F, N501T, etc. mutational types that enhance infectivity;<br>Y453, Q493, Q498, etc. residues that escape antibody | This work |
